# Supplementary material
Source: PubMed Central journal article supplement (PMC8490997)
Supplement: EMBR-22-e51136-s005.pdf [file EMBR-22-e51136-s005.pdf]

## Expanded View Figures

**Figure EV1. The C terminus of ATG9A harbors hallmarks of a signaling hub and is involved in self-association, and ATG9A trafficking.**

- A Graph showing disorder tendency of ATG9A across its amino acid sequence (predicted by ANCHOR web server at <http://anchor.elte.hu/>) and PTM distribution across the protein quantified by High Throughput Paper (HTP) observations (generated by PhosphoSitePlus® at <https://www.phosphosite.org/psrSearchAction>) (top). Schematic of ATG9A domain structure (bottom).
- B Schematic representation showing N- or C-terminal halves of mVenus fused to C terminus of ATG9A (top left). HCT-116 cells expressing ATG9A C-terminally labeled N mVenus or N + C mVenus constructs were grown in full DMEM media, fixed, and imaged (Scale bar = 10  $\mu$ m) (right). Fluorescence intensity of cells expressing ATG9A C-terminally labeled mVenus constructs was measured via flow cytometry. Mean  $\pm$  SEM,  $n = 1$ (bottom left).
- C HeLa ATG9A WT, ATG9A KO, or ATG9A KO cells reconstituted with ATG9A WT and ATG9A  $\Delta$ C mutant stably expressing GFP-LC3 were grown in full media and whole-cell lysates followed by immunoblotting with indicated antibodies (left). Quantification of normalized GFP and normalized LC1I/LC3I ratio. Mean  $\pm$  SEM,  $n = 3$  (biological replicates). Significance measured using RM one-way ANOVA followed by Fisher's LSD tests. <sup>n</sup> $P > 0.05$ , \* $P \leq 0.05$ , \*\* $P \leq 0.01$ , \*\*\* $P \leq 0.001$ , \*\*\*\* $P \leq 0.0001$ .

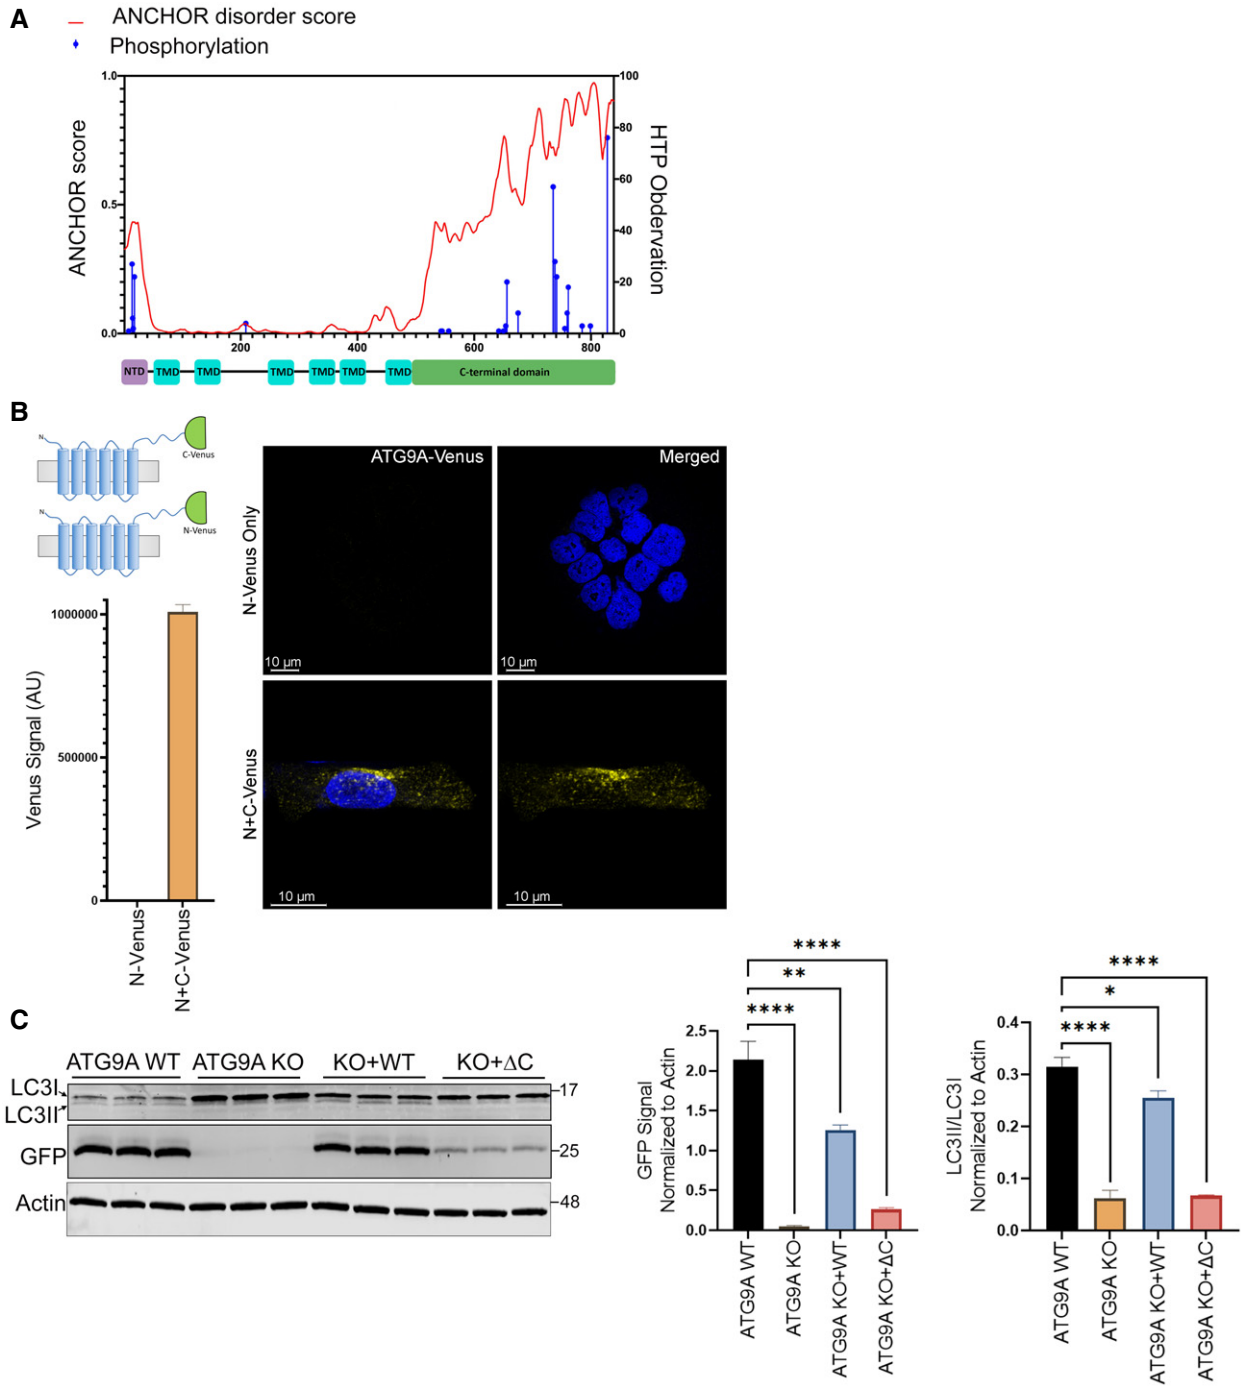

Figure EV1.

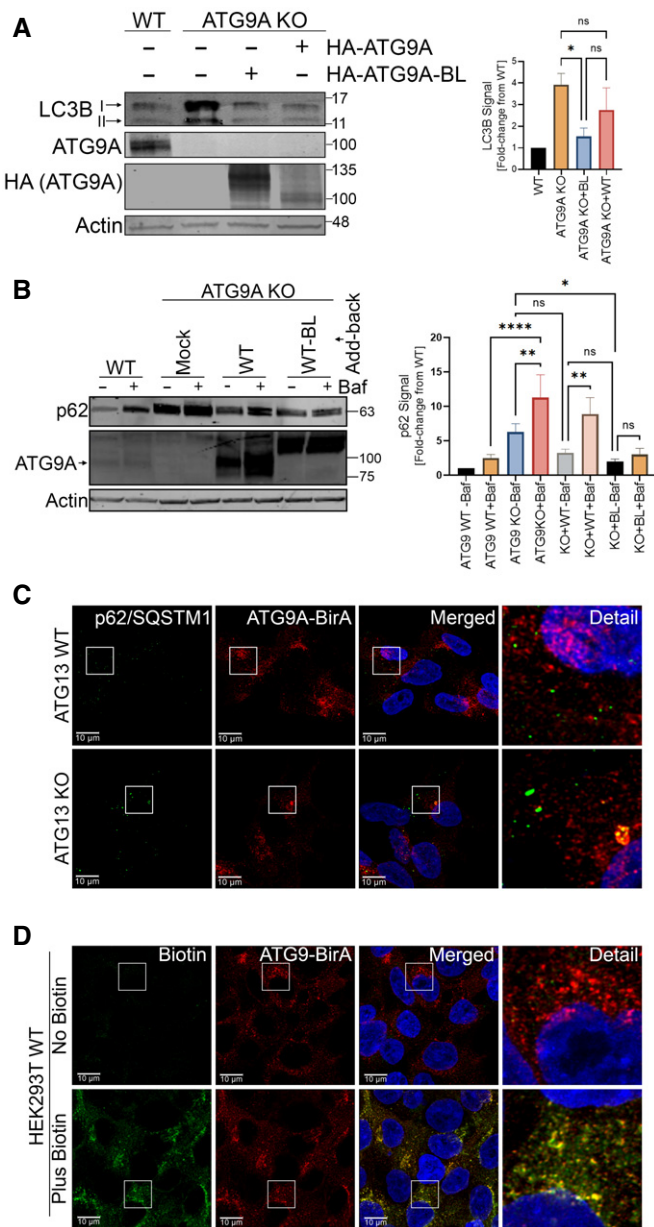**Figure EV2. Functional validation of HA-ATG9A-BirA\* constructs.**

- A** HEK293T WT, ATG9A KO, and ATG9A KO cells reconstituted with HA-ATG9A and HA-ATG9A-BirA\* were grown in full DMEM media, lysed, and immunoblotted with indicated proteins (left). Quantification of normalized LC3B infrared signal. Mean  $\pm$  SEM,  $n = 3$  (biological replicates). Significance measured using RM one-way ANOVA followed by Fisher's LSD tests (right).
- B** HEK293T WT, ATG9A KO, and ATG9A KO cells reconstituted with HA-ATG9A and HA-ATG9A-BirA\* were grown in full DMEM media with or without 100nM Bafilomycin for 24 h, lysed, and immunoblotted with indicated proteins (left). Quantification of normalized p62 infrared signal. Mean  $\pm$  SEM,  $n = 3$  (biological replicates). Significance measured using RM one-way ANOVA followed by Fisher's LSD tests (right).
- C** Confocal images of p62/SQSTM1 colocalization with HA-ATG9A-BirA\* in HEK293T ATG13 WT and ATG13 KO cells stably expressing HA-ATG9A-BirA\*. Cells were grown in full DMEM media, fixed, and labeled with antibodies for p62/SQSTM1 and HA (Scale bar = 10  $\mu$ m).
- D** Confocal images of biotinylated proteins colocalized with HA-ATG9A-BirA\*. HA-ATG9A-BirA\*-expressing cells were grown in full DMEM media with or without biotin incubation (12 h), fixed, and labeled with Alexa Fluor 488-conjugated streptavidin and HA antibody (Scale bar=10  $\mu$ m). <sup>ns</sup> $P > 0.05$ , \* $P \leq 0.05$ , \*\* $P \leq 0.01$ , \*\*\* $P \leq 0.001$ , \*\*\*\* $P \leq 0.0001$ .

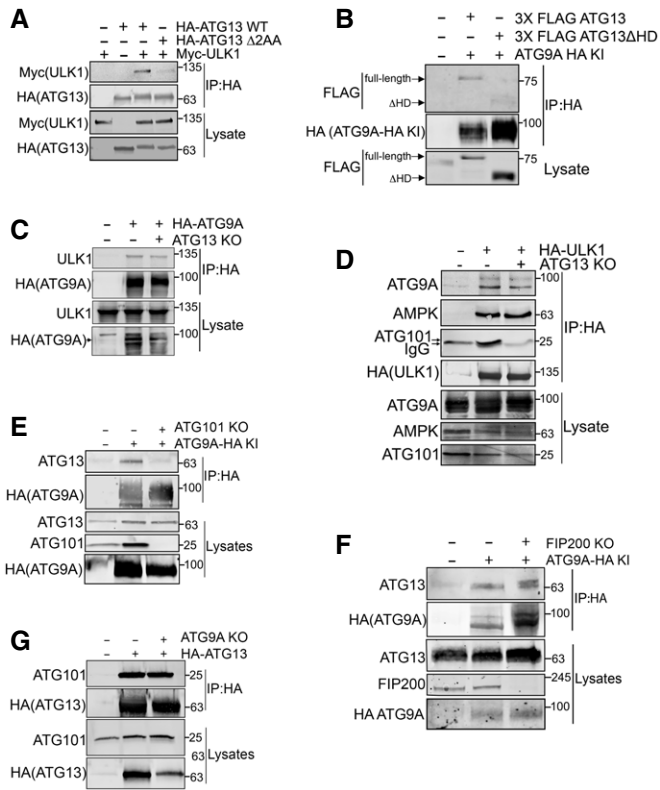

**Figure EV3. ATG9A interacts with an ULK1-independent ATG13-ATG101 subcomplex via the ATG13 HORMA domain.**

A The ULK1 binding-deficient mutant of ATG13 (ATG13 Δ2AA) was validated by immunoprecipitating HA-ATG13 or HA-ATG13 Δ2AA and immunoblotting for Myc-ULK1 in HCT-116 ATG13 KO cells.

B HCT-116 parental or HCT-116 ATG9A-HA KI ATG13 KO cells reconstituted with 3X FLAG-ATG13 WT or 3X FLAG-ATG13 ΔHORMA were grown in full DMEM media and subjected to size exclusion chromatography. Fractions with high levels of ATG9A-HA were pooled to facilitate immunoprecipitation. ATG9A-HA was immunoprecipitated from pooled fractions followed by immunoblotting with indicated antibodies.

C Co-IP of overexpressed HA-ATG9A from HCT-116 ATG13 KO cells followed by immunoblotting with indicated antibodies.

D Co-IP of HA-ULK1 from HCT-116 ATG13 WT and KO cells followed by immunoblotting with indicated antibodies.

E Co-IP of endogenous ATG9A from HCT-116 ATG9A-HA KI ATG101 KO cells followed by immunoblotting with indicated antibodies.

F Co-IP of endogenous ATG9A from HCT-116 ATG9A-HA KI FIP200 KO cells followed by immunoblotting with indicated antibodies.

G Co-IP of overexpressed HA-ATG13 from HEK293T ATG9A KO cells followed by immunoblotting with indicated antibodies.

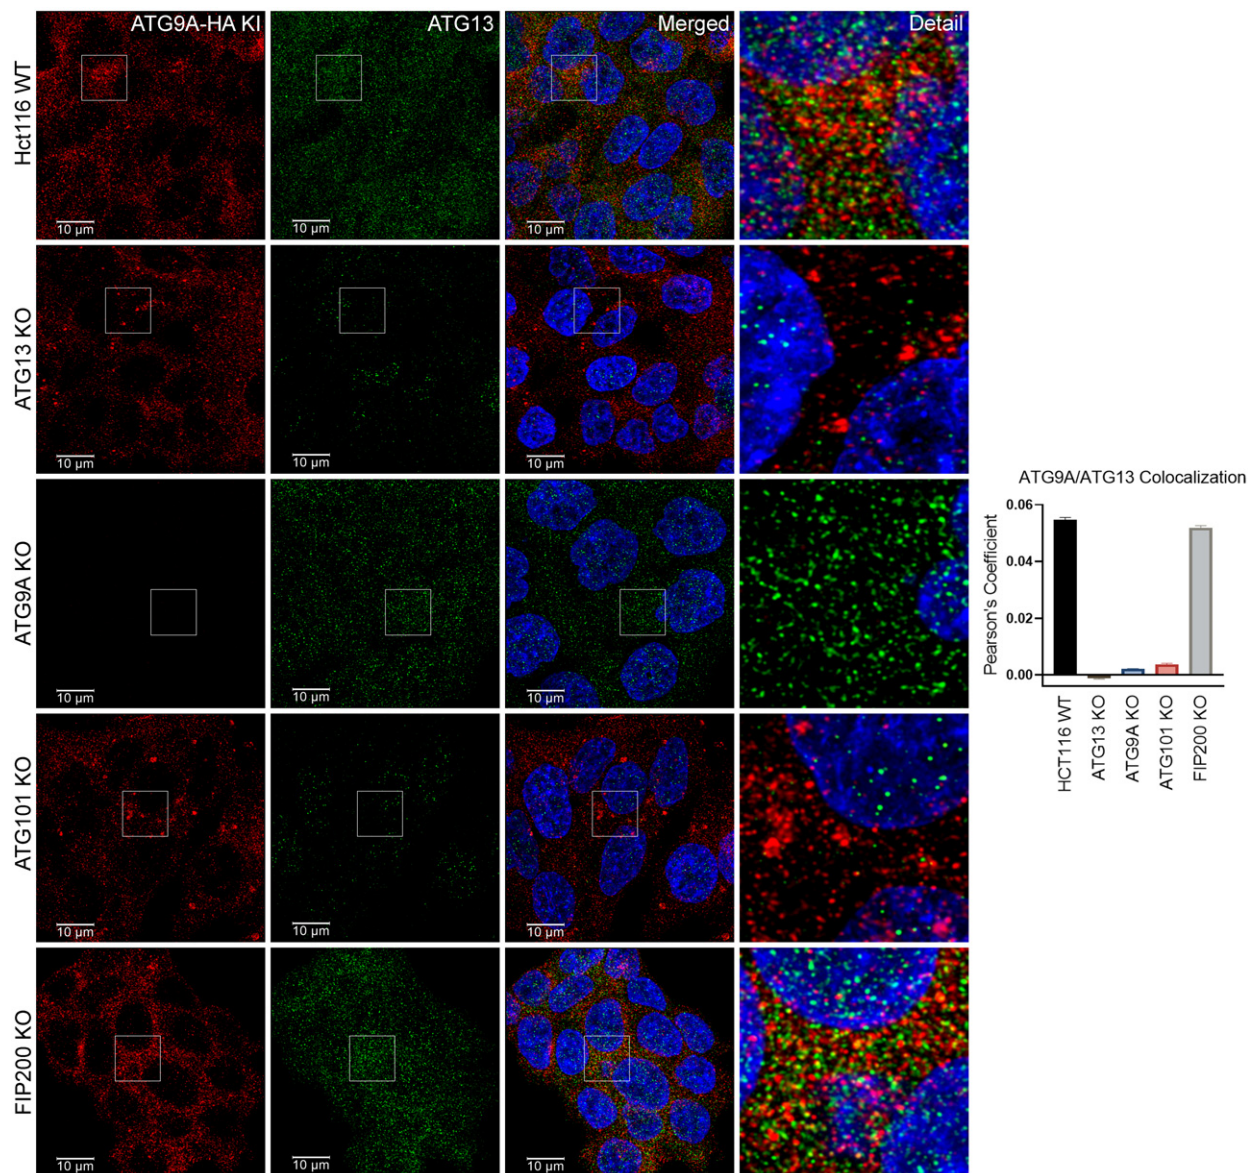

**Figure EV4. ATG13 colocalization with ATG9A is independent of FIP200/ULK1 complex.**

HCT-116 ATG9A-HA KI ATG13 WT, ATG13 KO, ATG101 KO, ATG9A KO, and FIP200 KO cells were grown in full DMEM media, fixed, labeled with antibodies for HA and ATG13, and imaged (Scale bar = 10  $\mu$ m) (left). Quantification of ATG9A colocalization with ATG13. Mean  $\pm$  SEM,  $n = 1$  independent experiment with 30 technical replicates. Images are derived from the same experiment as Fig EV5 and Appendix Fig S3.

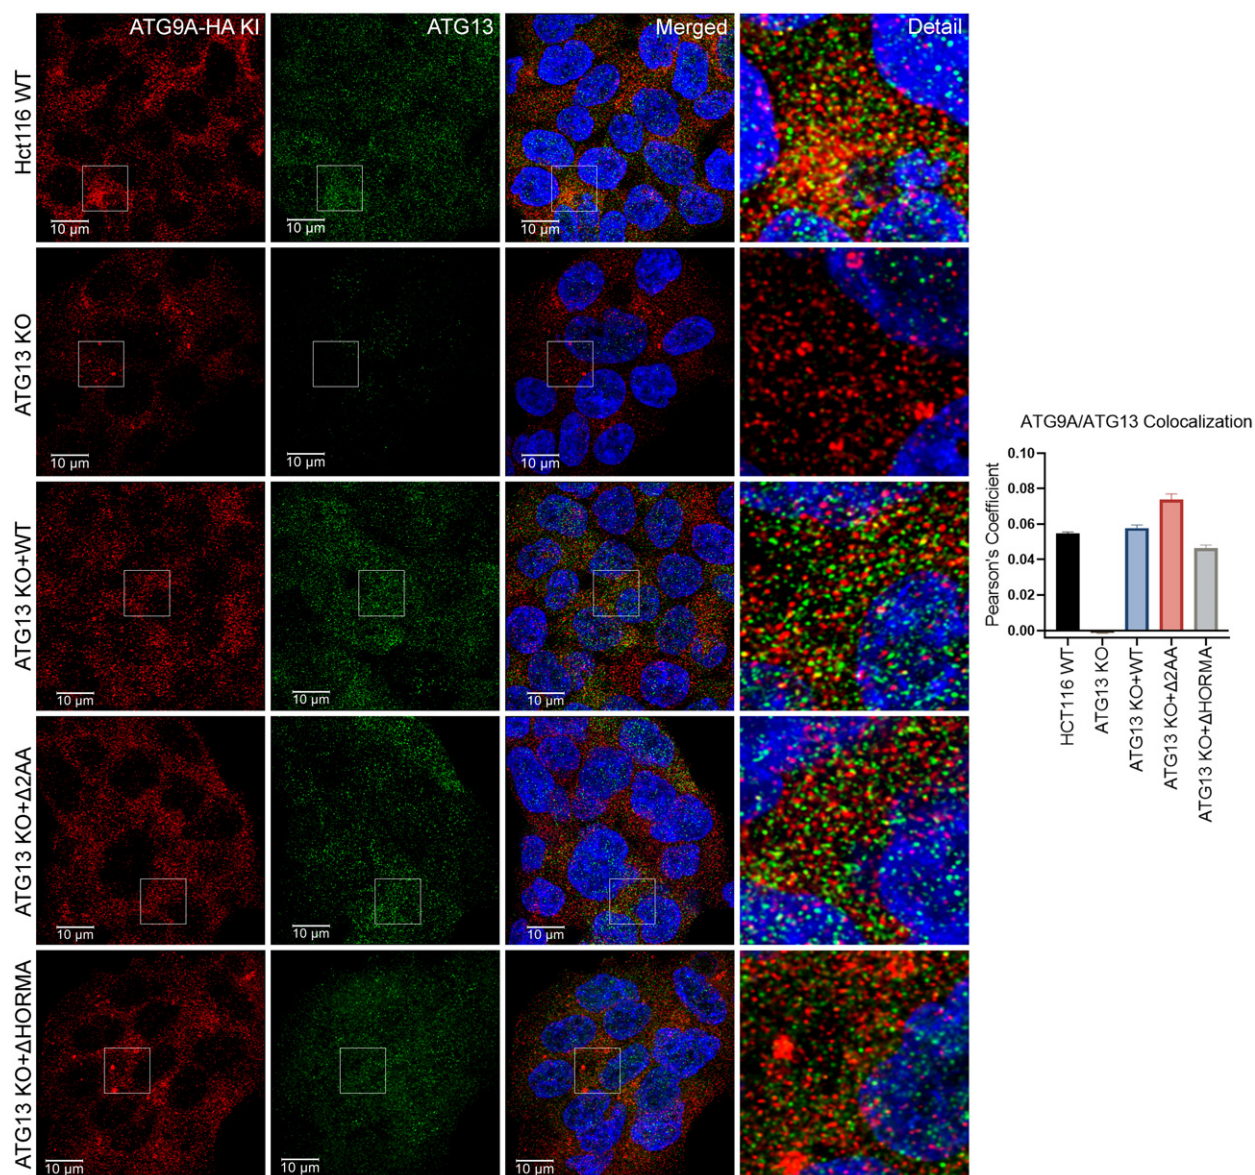

**Figure EV5. ATG13 colocalization with ATG9A requires the ATG13 HORMA domain, but occurs independently of ULK1 binding.**

- A, B HCT-116 ATG9A-HA KI ATG13 WT, ATG13 KO or ATG13 KO cells reconstituted with ATG13 WT, ATG13  $\Delta$ 2AA, and ATG13  $\Delta$ HORMA. Cells were grown in full DMEM media, fixed, labeled with antibodies for HA and ATG13, and imaged. (Scale bar = 10  $\mu$ m).
- C Quantification of ATG9A colocalization with ATG13. Mean  $\pm$  SEM,  $n = 1$  independent experiment with 30 technical replicates. Images are derived from the same experiment as Fig EV4 and Appendix Fig S3.
