# Supplementary material
Source: PubMed Central journal article supplement (PMC8490997)

These are the source blots for figure 5A

ATG13

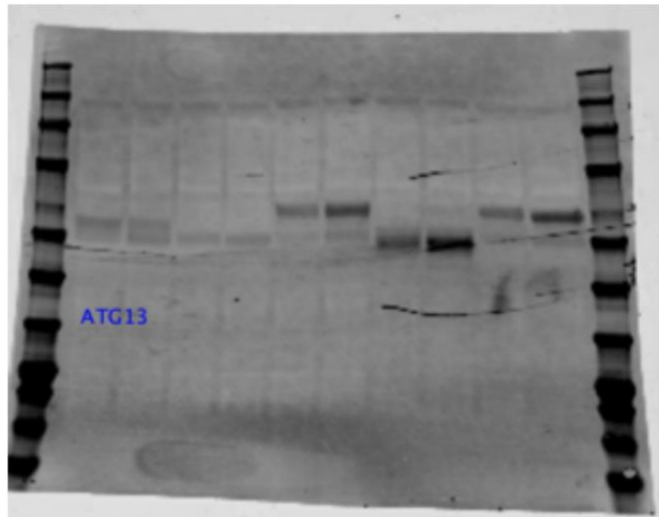

p62

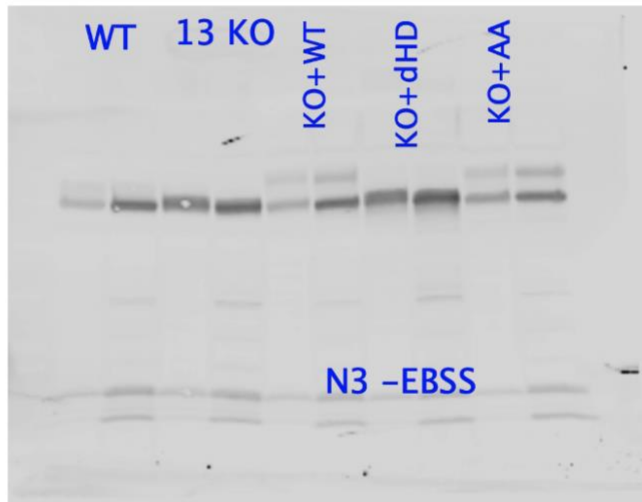

Actin

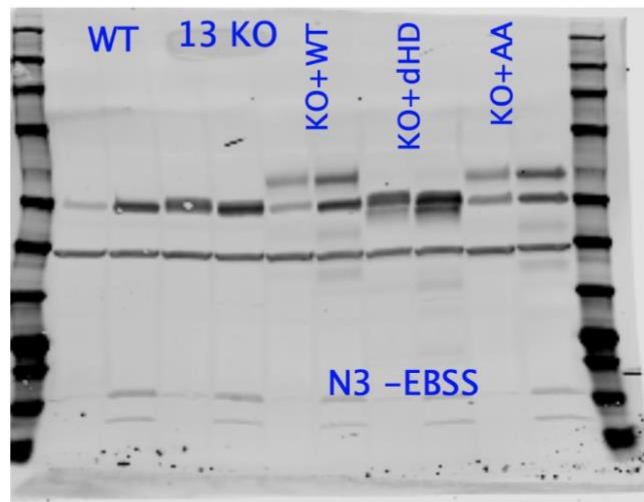

These are the source blots for figure 5B

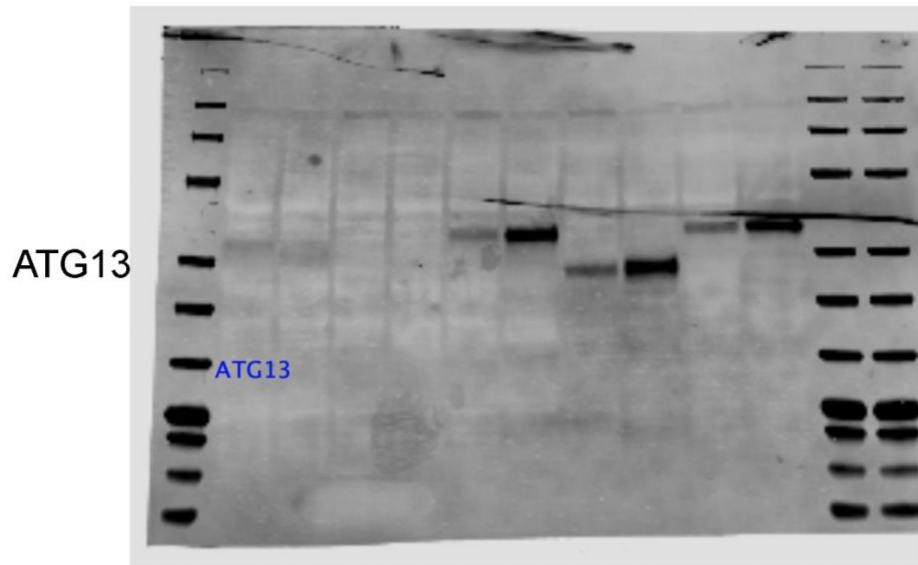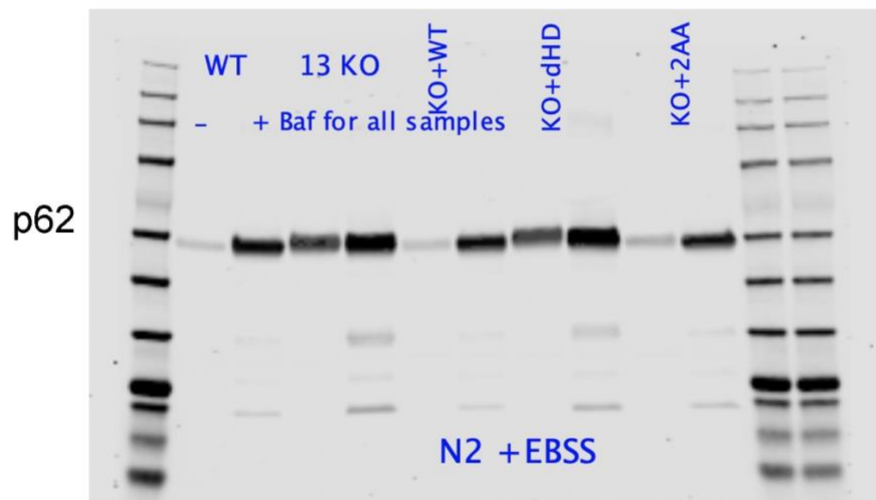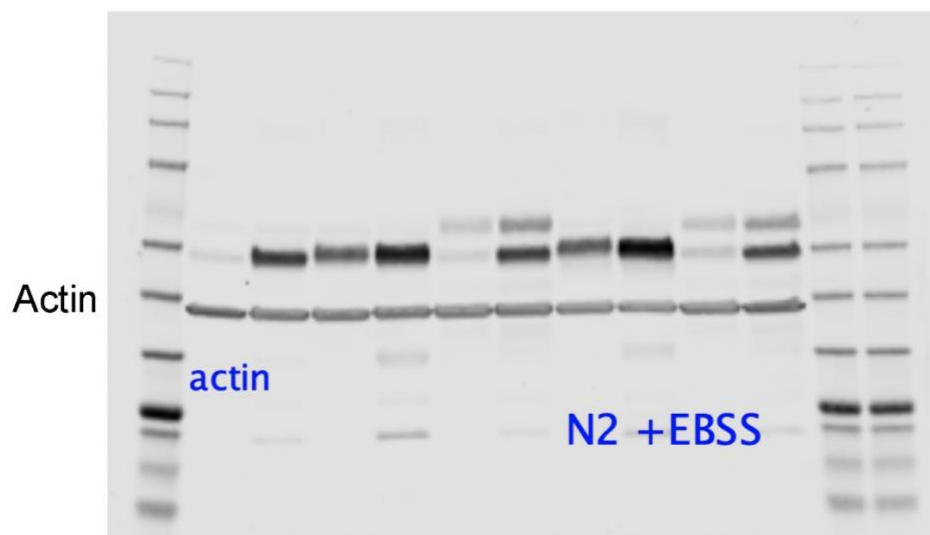

Supplement: EMBR-22-e51136-s004.pdf [file EMBR-22-e51136-s004.pdf]
